# Supplementary material
Source: PubMed Central journal article supplement (PMC2855249)
Supplement: Supp_Fig.pdf [file Supp_Fig.pdf]

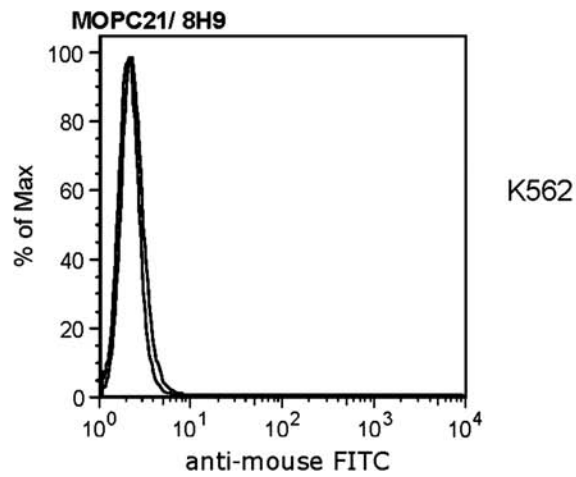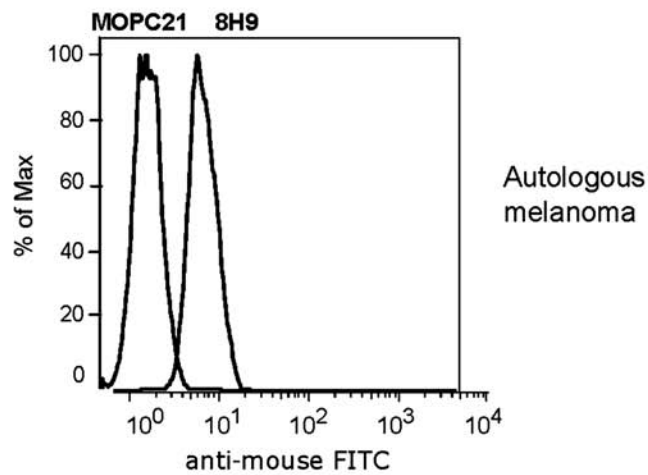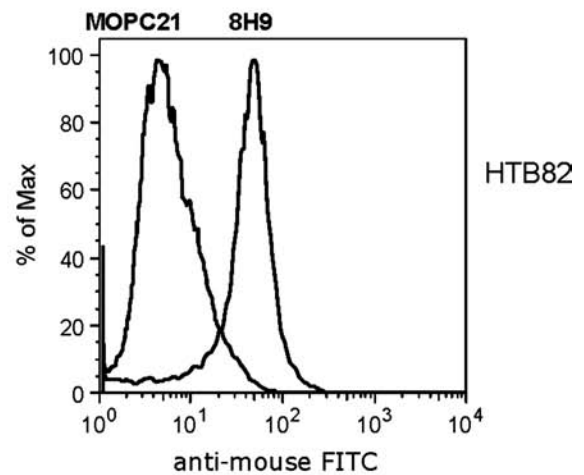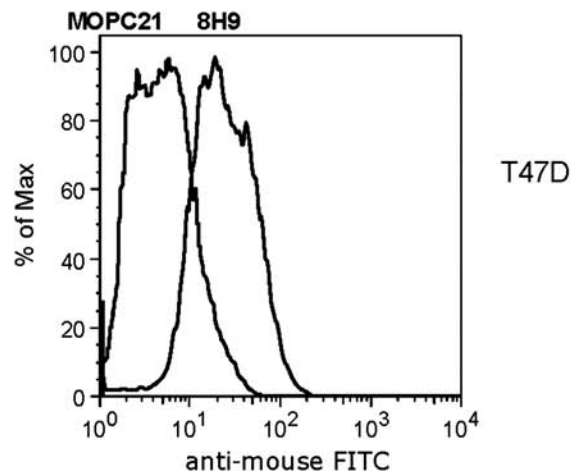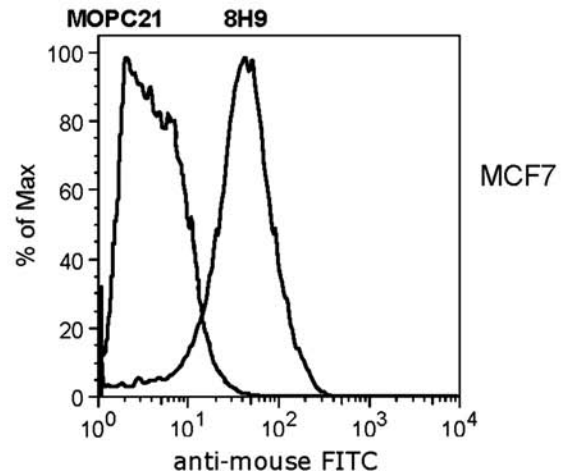

**SUPPLEMENTAL FIG S1.** Presence of gp58 antigen on the surface of tumor cells was determined as previously described (Modak *et al.*, 2001). Solid tumor cells were resuspended in trypsin-free cell dissociation solution (Sigma). Cells were washed in PBS and incubated with 8H9 antibody or non-specific IgG1 antibody MOPC21 at 4°C for 1 h. After washing in PBS cells were incubated with FITC-conjugated secondary goat anti-mouse IgG1 (BD Biosciences Pharmingen) at 4°C.
